# Supplementary material for: How to reliably detect molecular clusters and nucleation mode particles with Neutral cluster and Air Ion Spectrometer (NAIS)
Source: Copernicus journal article supplement (doi:10.5194/amt-2016-25), 2016-04-06
Supplement: Supplementary file 2 [file amt-2016-25-supplement.zip]

# How to open the instrument and clean the mobility analysers

Instructions for the NAIS user

Written by Alessandro Franchin

University of Helsinki

2013

Moi,  
this are the instrunctions on how to clean the EM rings of the NAIS  
I will start with the easy way that implies that you have a cleaning rod available.  
I transported it to CERN, so it should be somewhere there.  
This is how it looks like:

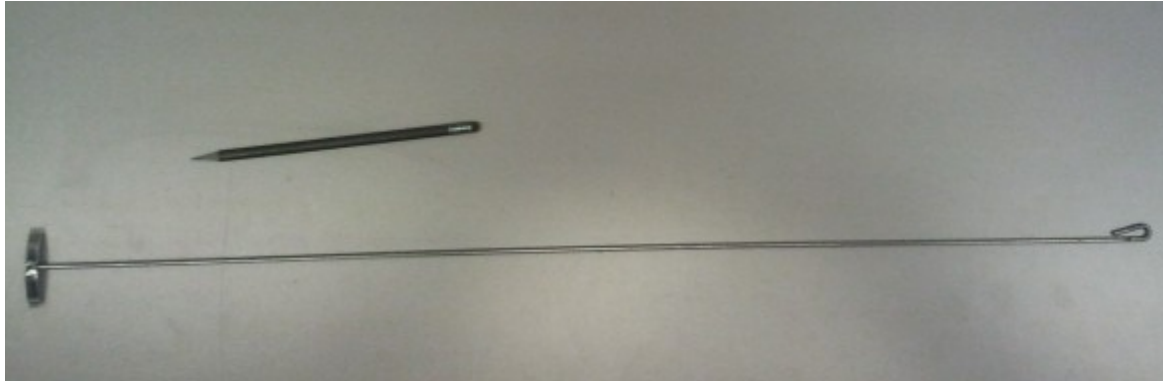

In case you have it the cleaning it's going to take 15-20 mins, otherwise the procedure is a bit longer, but not too bad.  
Let's start:

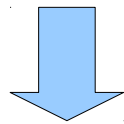

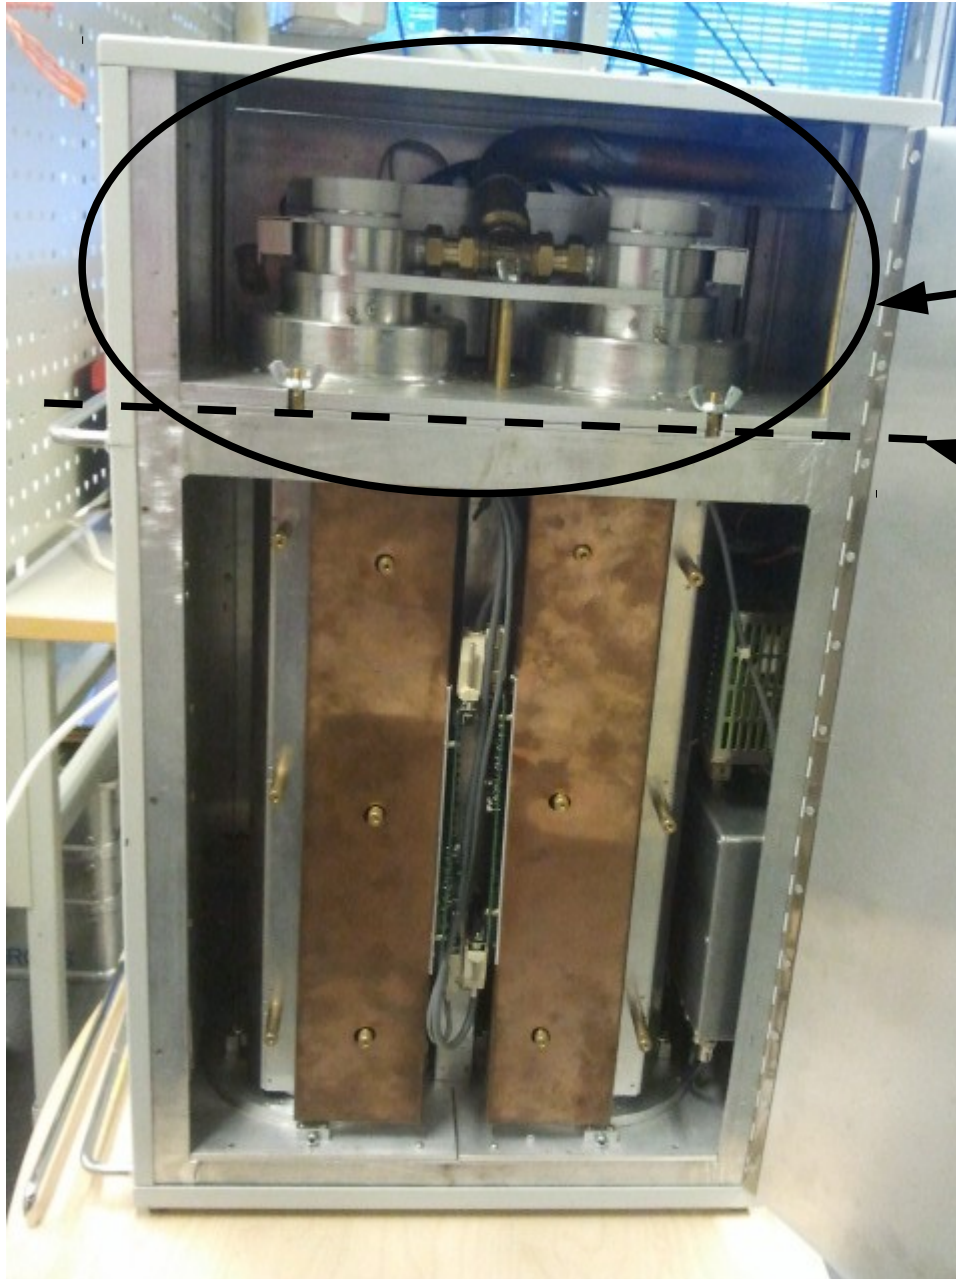

The instrument looks a bit like this,  
Even though this is an AIS  
First you have to remove the top

To do this we need to open the top and the  
side walls, removing the screws that hold  
them In place

This is where the top part is  
supposed to get up

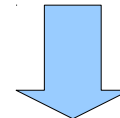

In this way both sides of the instrument are accessible

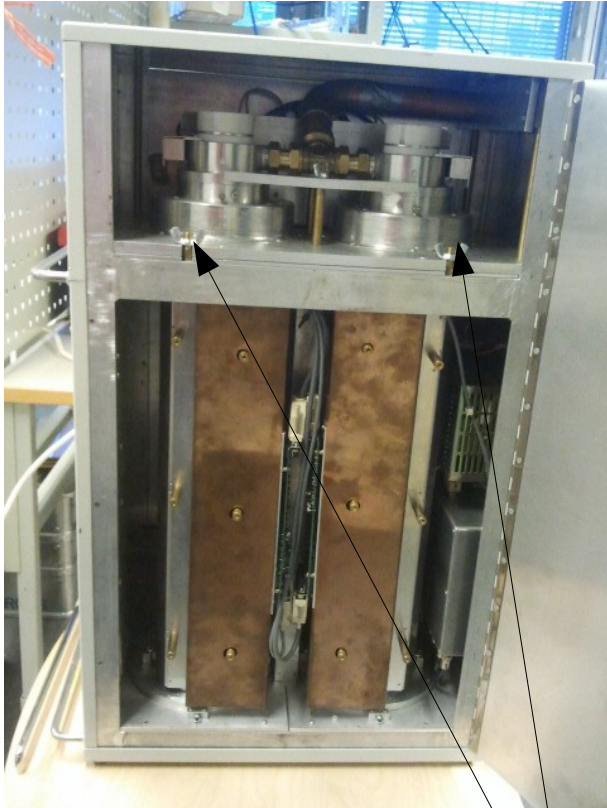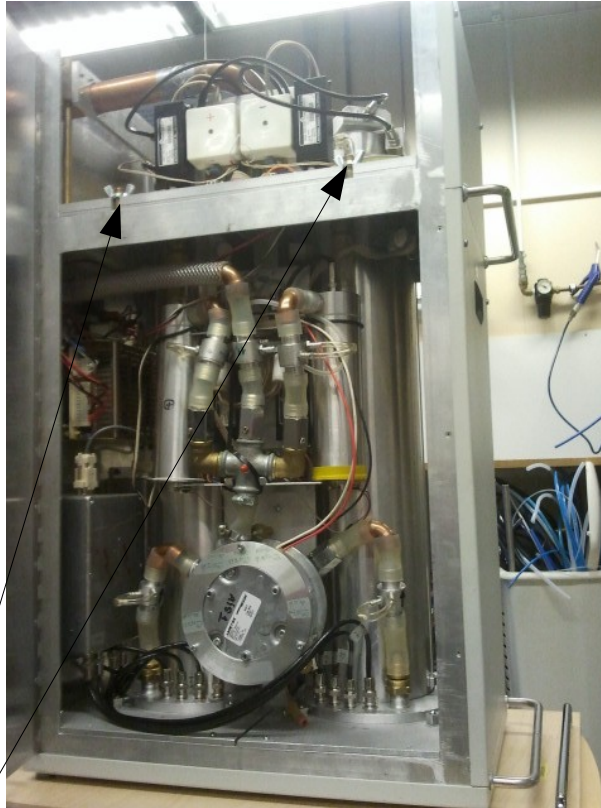

Now unscrew this butterfly screws

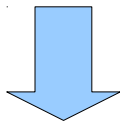



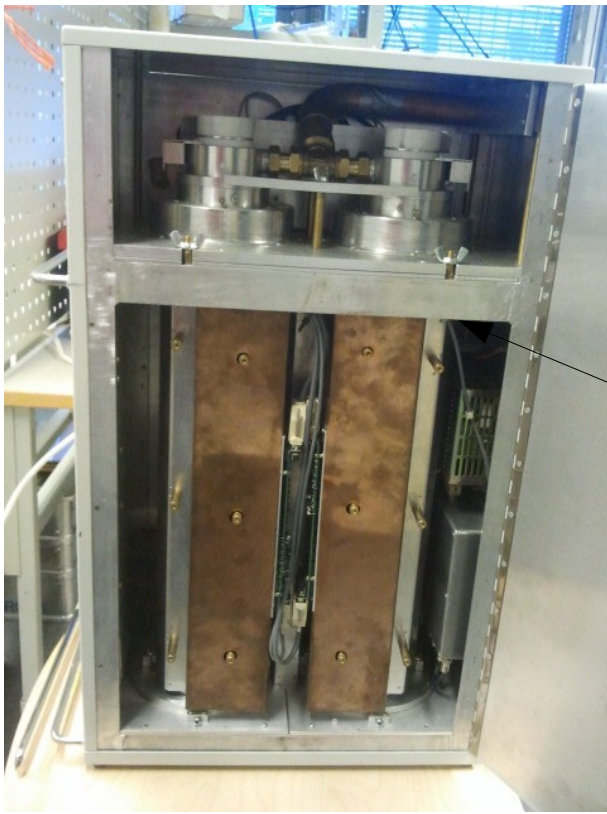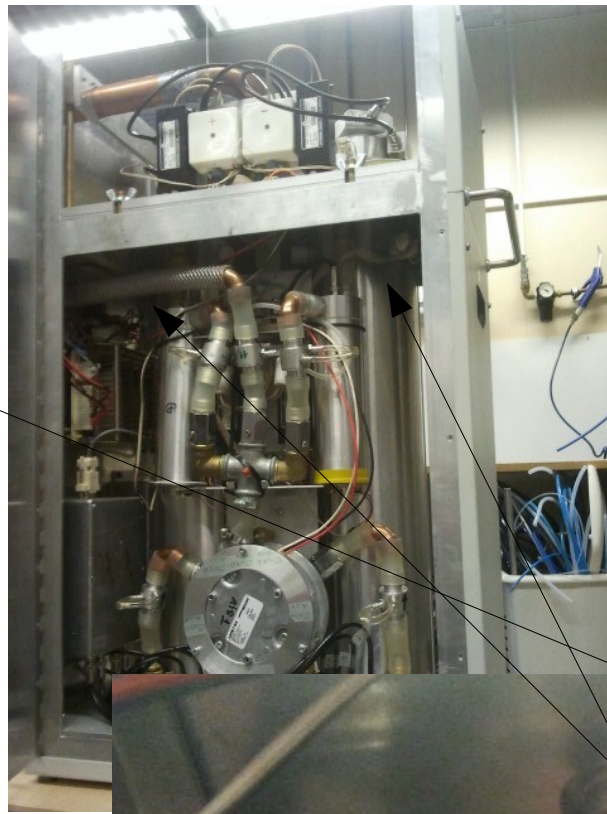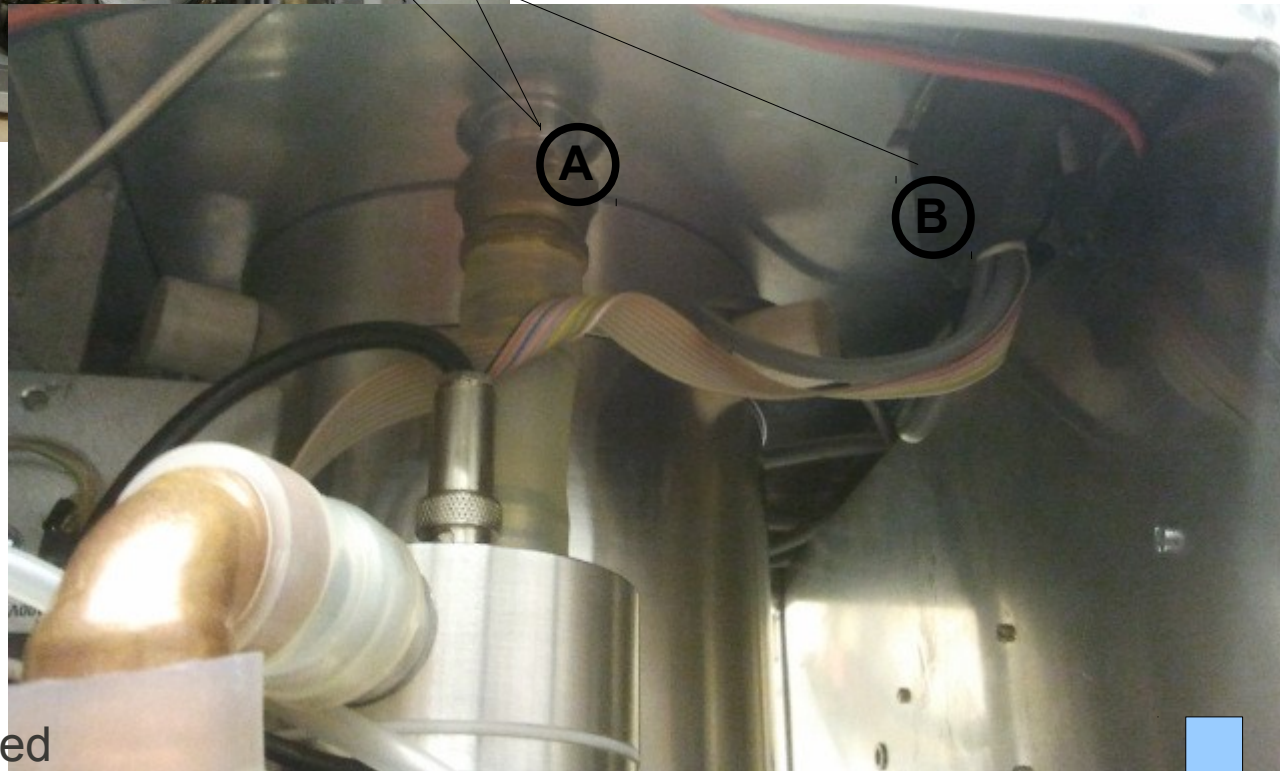

Unscrew the two pipes (A)  
From each analyzer  
You might need a wernch

Disconnect also the two  
Connectors (B) if I remember  
correctly there is one on each  
Side

In this way the top i free to be lifted

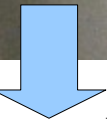

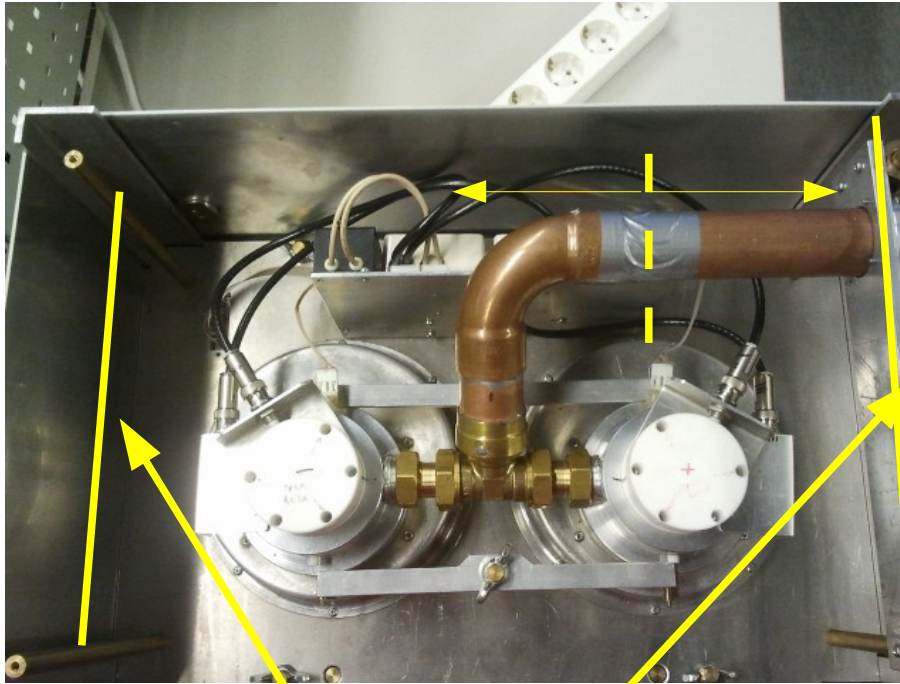

Remember to  
disconnect the inlet  
Before lifting the top  
part

These are good point for lifing

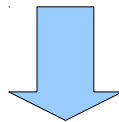

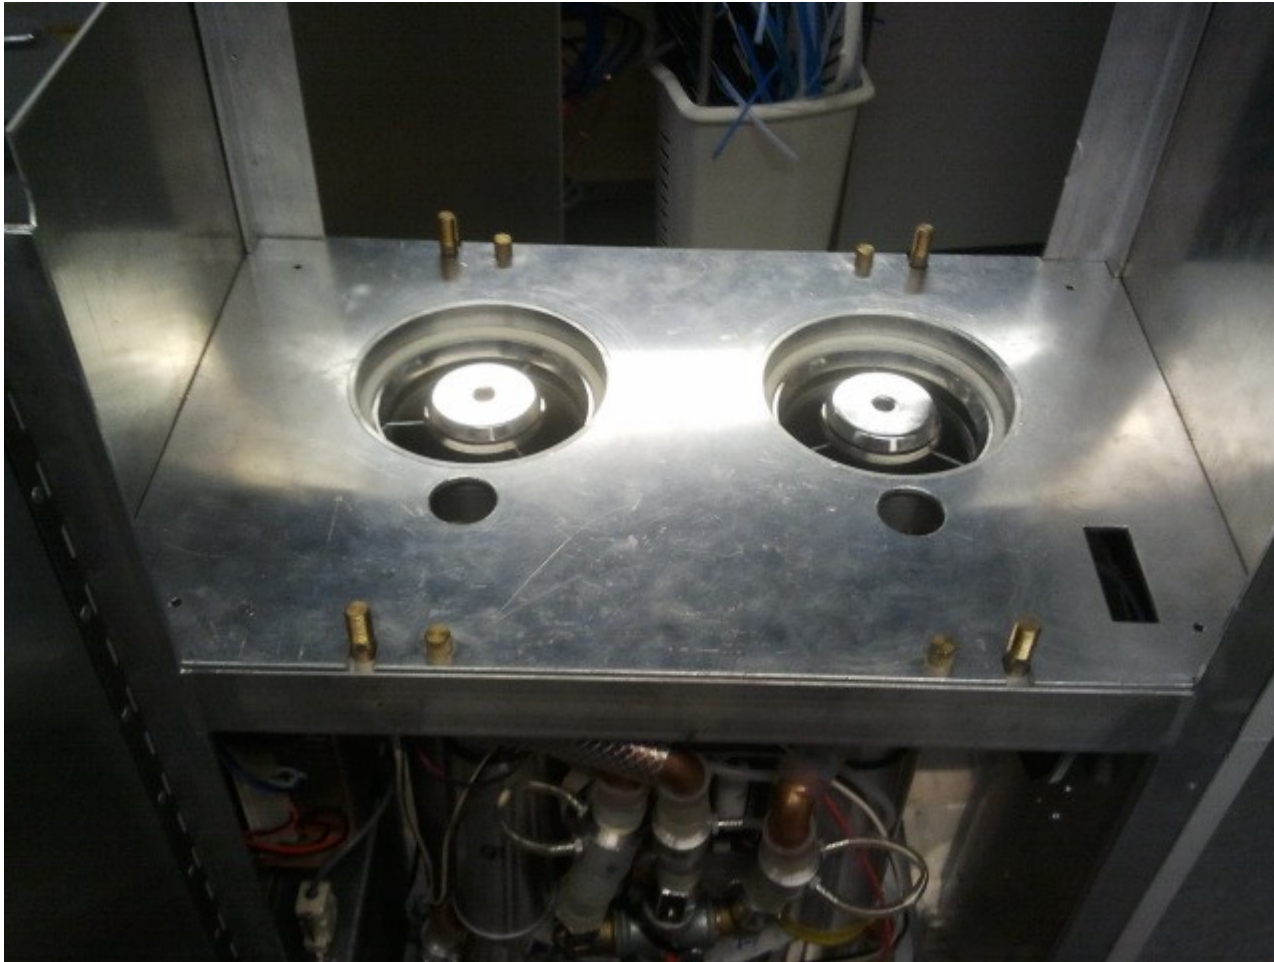

This is how it looks like once  
The top panel has been  
Removed

If you haven't found the  
cleaning rod skip to slide 8





Clean with the rubber part the EM with vertical and tangential movements when done skip to slide 24

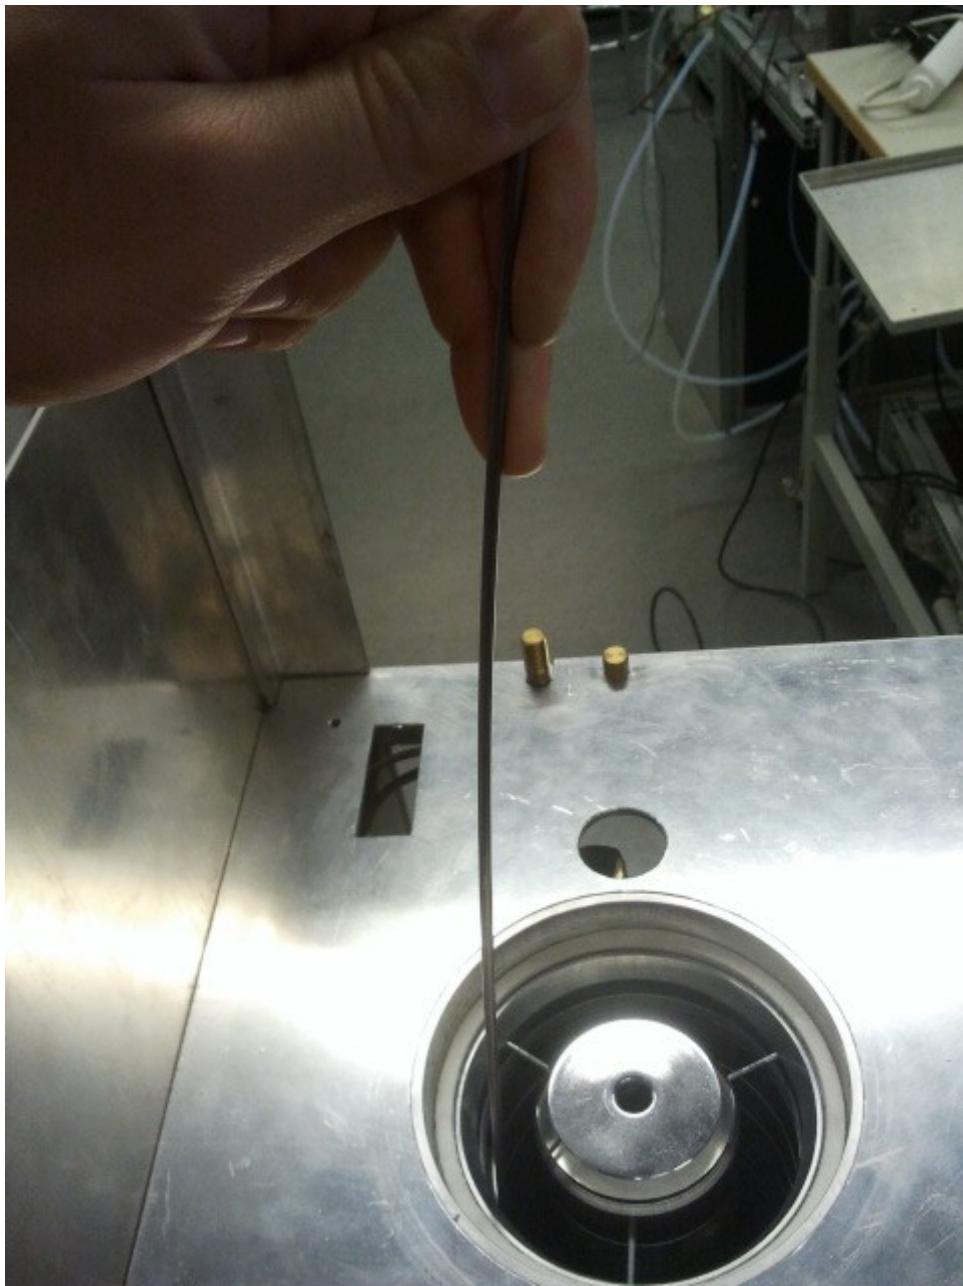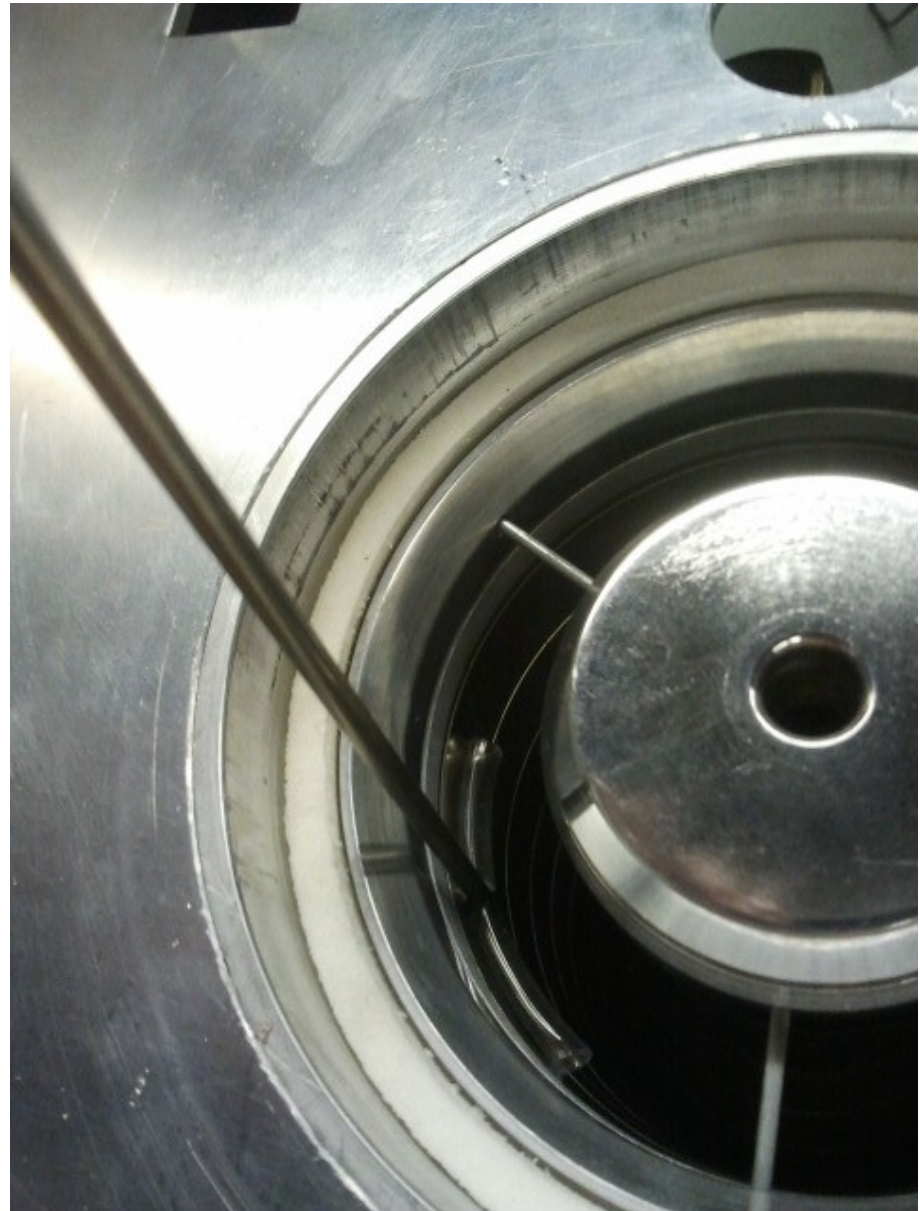



In case you don't have the cleaning tool  
You have to remove the analyzers:

First unscrew these screws

And remove the metallic plate

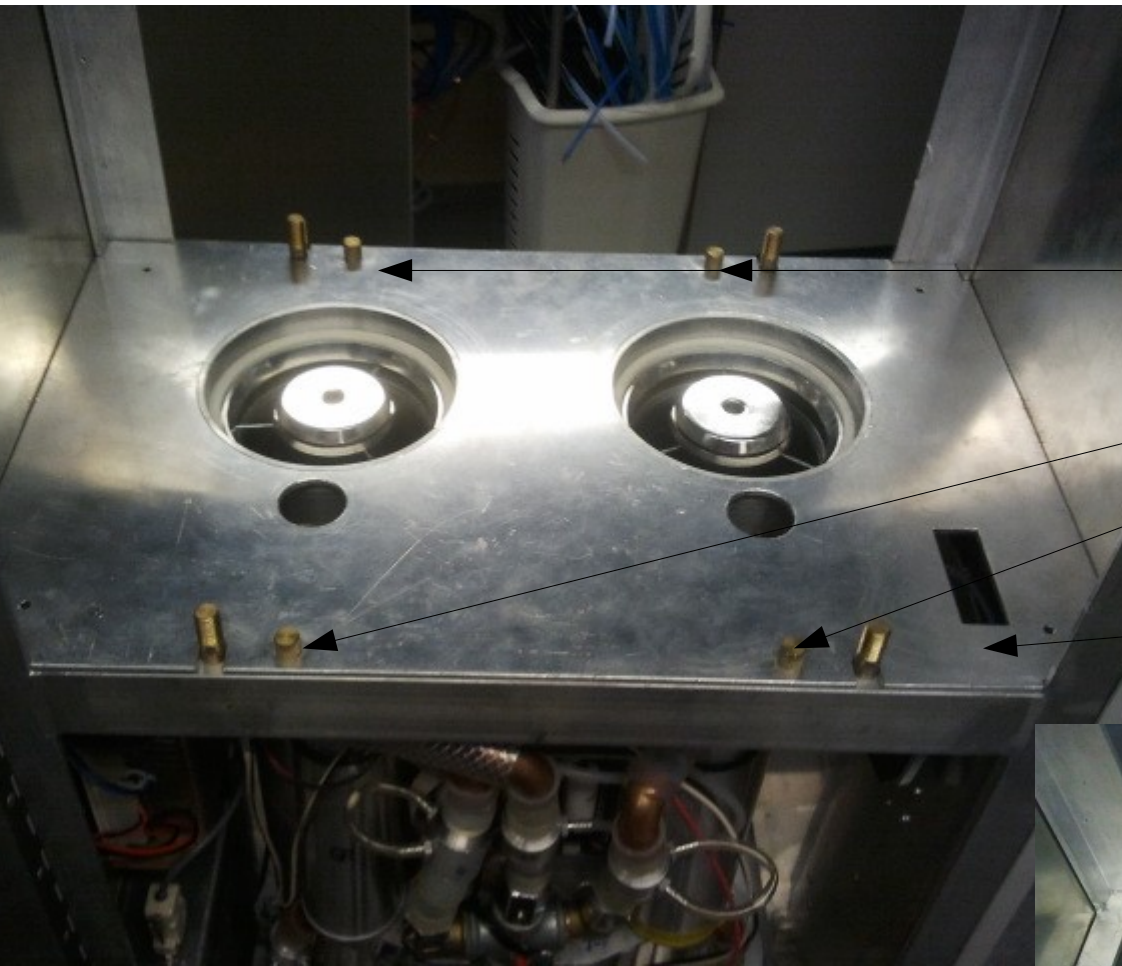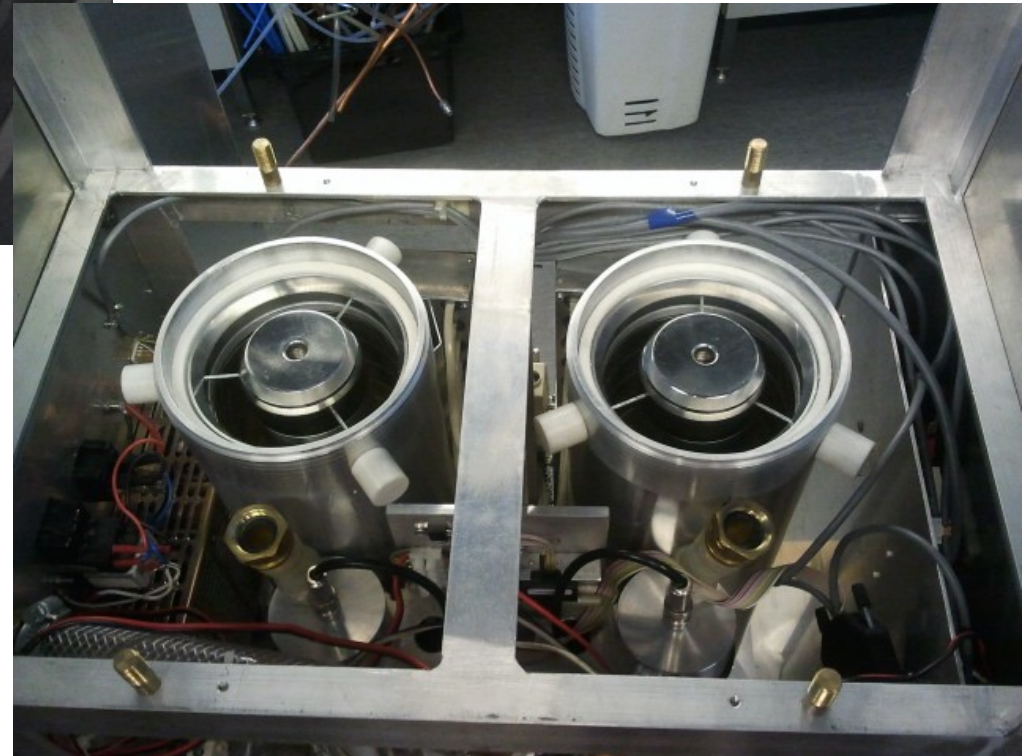

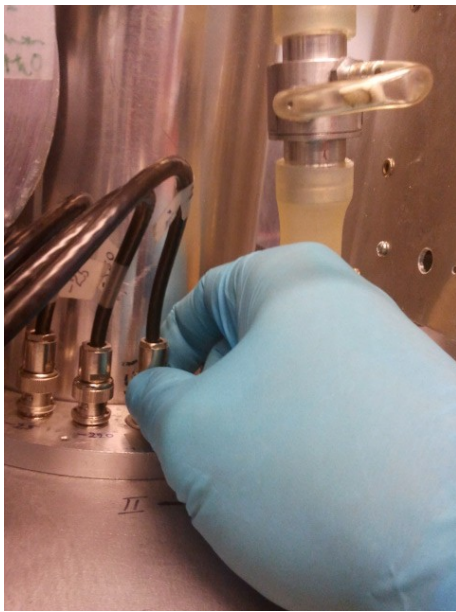

1- Disconnect the BNC at the base of the analyzer

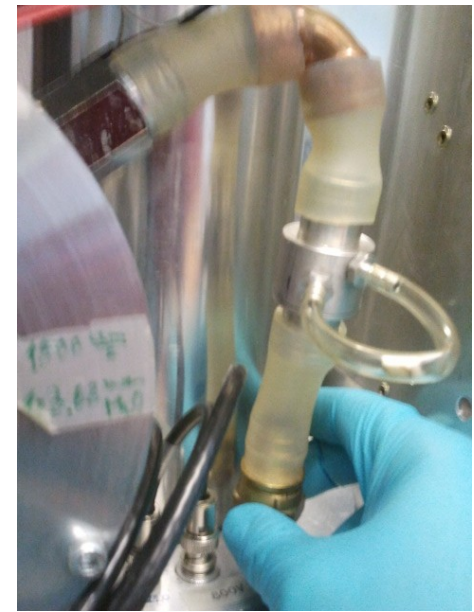

2- disconnect the sheath gas connector  
(it's next to the BNCs)

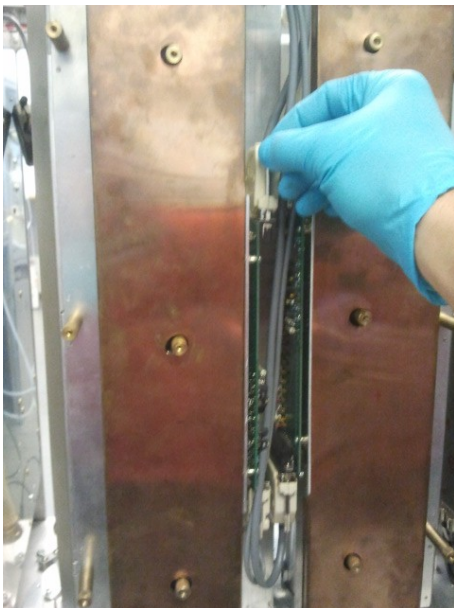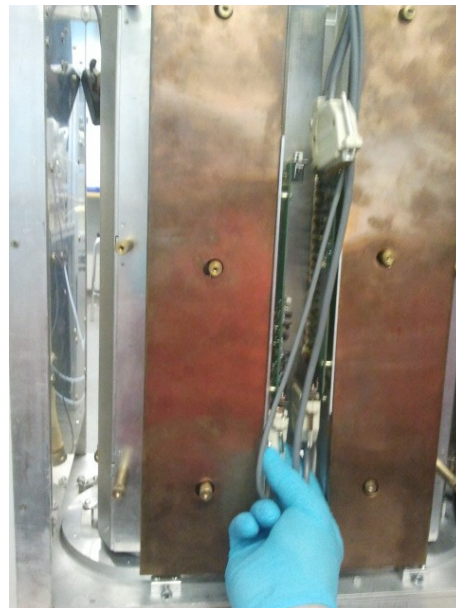

3 – disconnect the electronic connectors

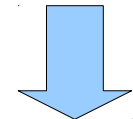

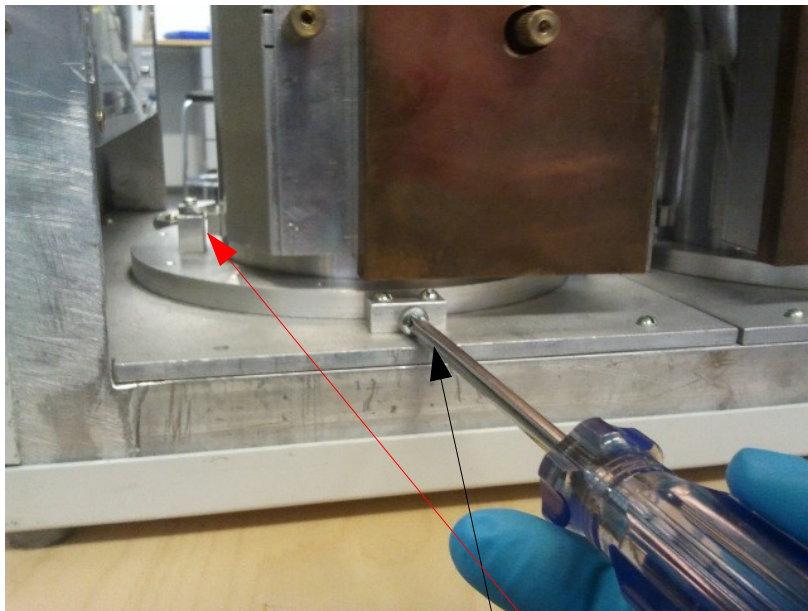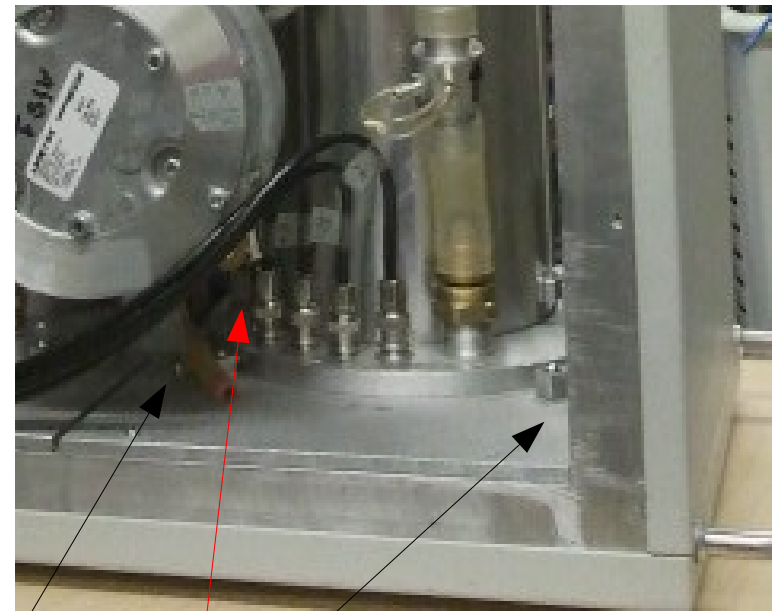

4- Open the 3 screws that keep the analyzer  
In place  
ATT!! do not confuse them with the two that keep the outer  
part connected to the inner one don't open those one yet!

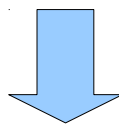



Lift the analyzer up and then  
Incline it and remove it from the rack  
From the bottom

The red circles are good points where  
to hold the analyzer

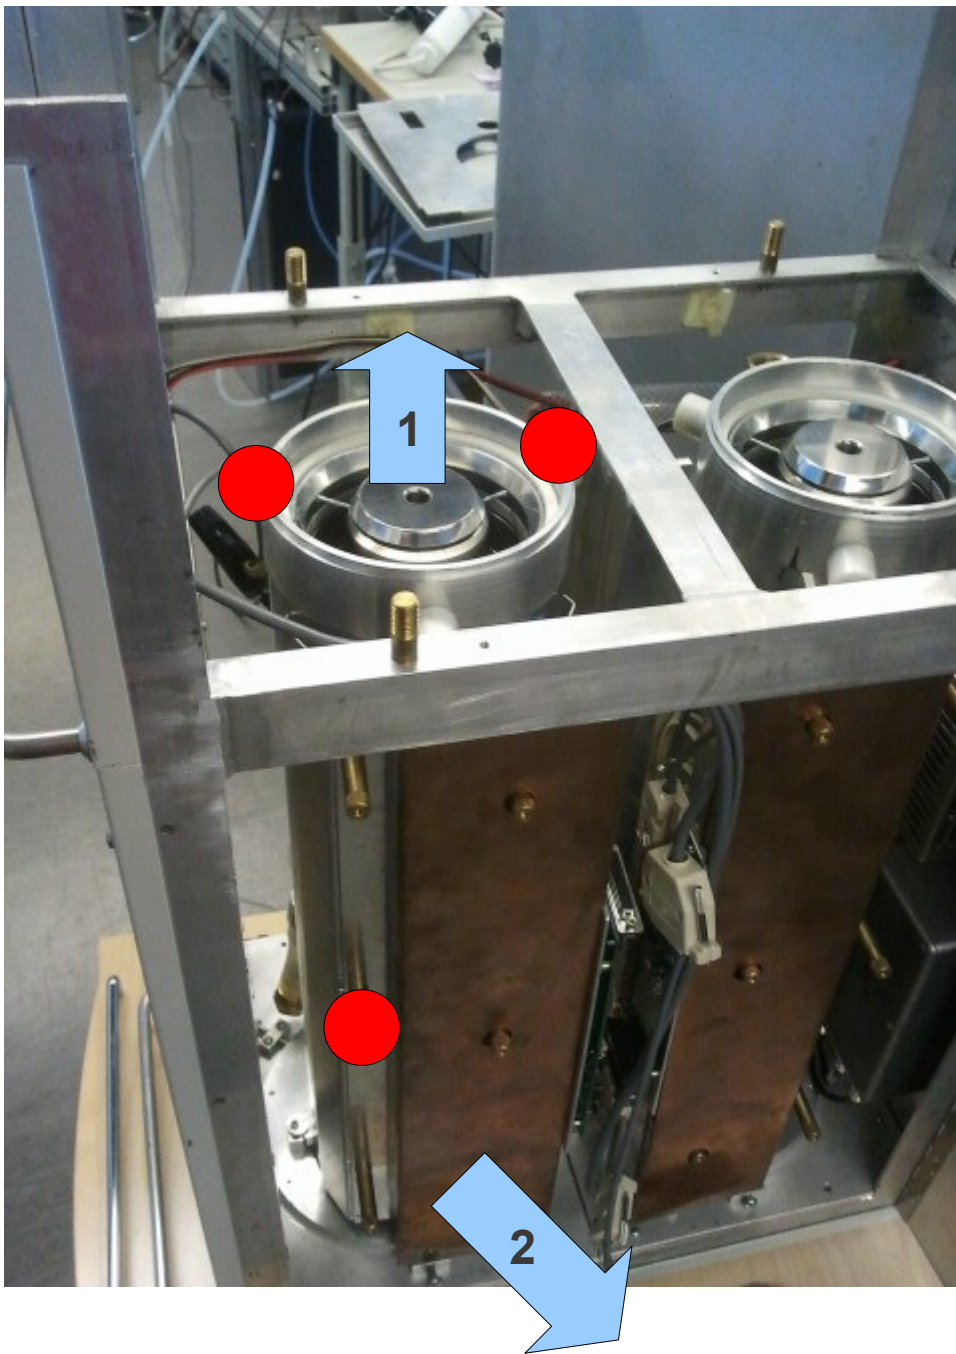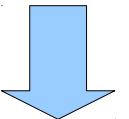

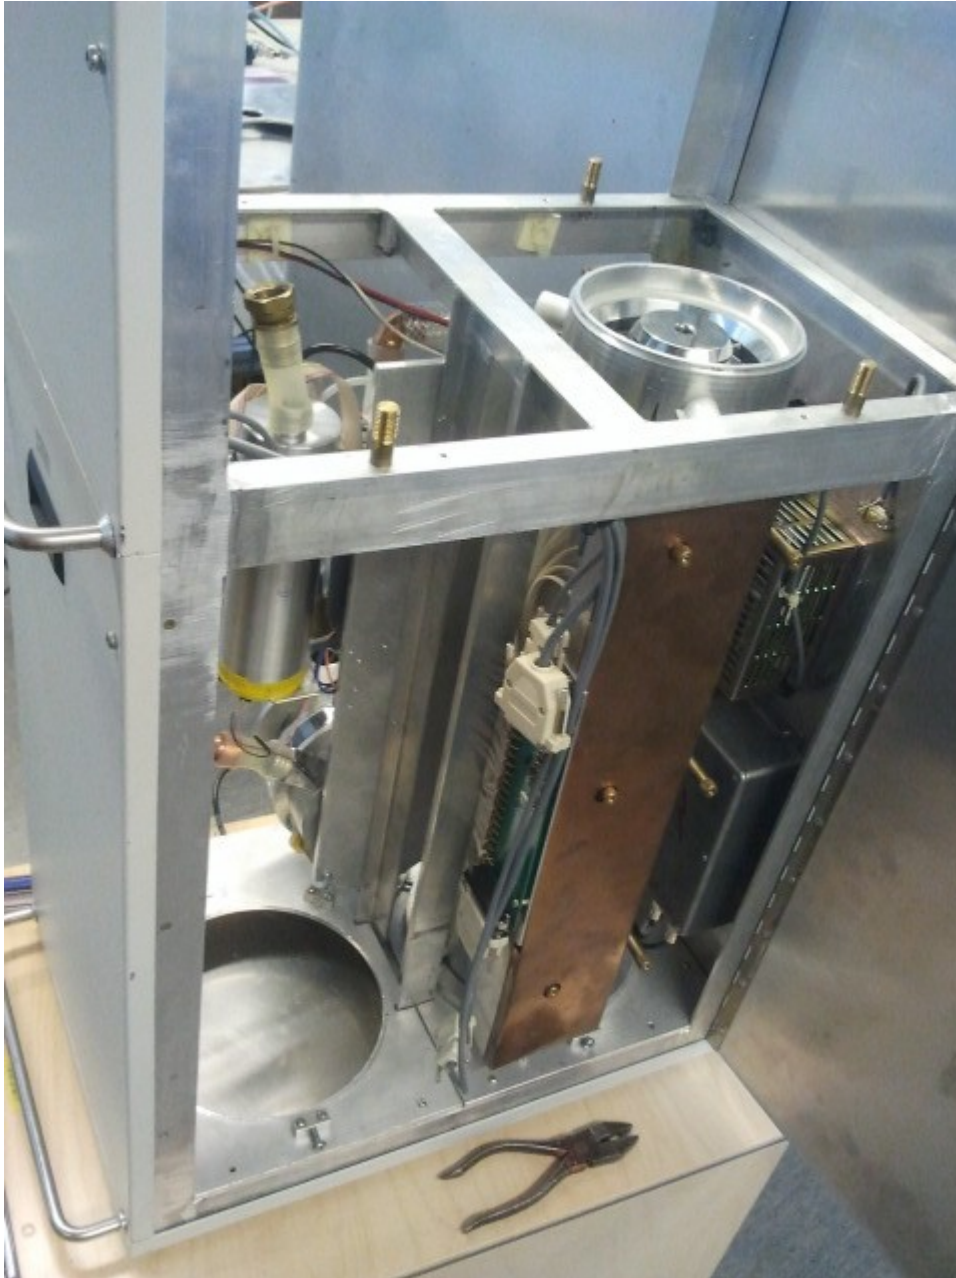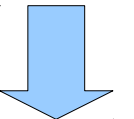

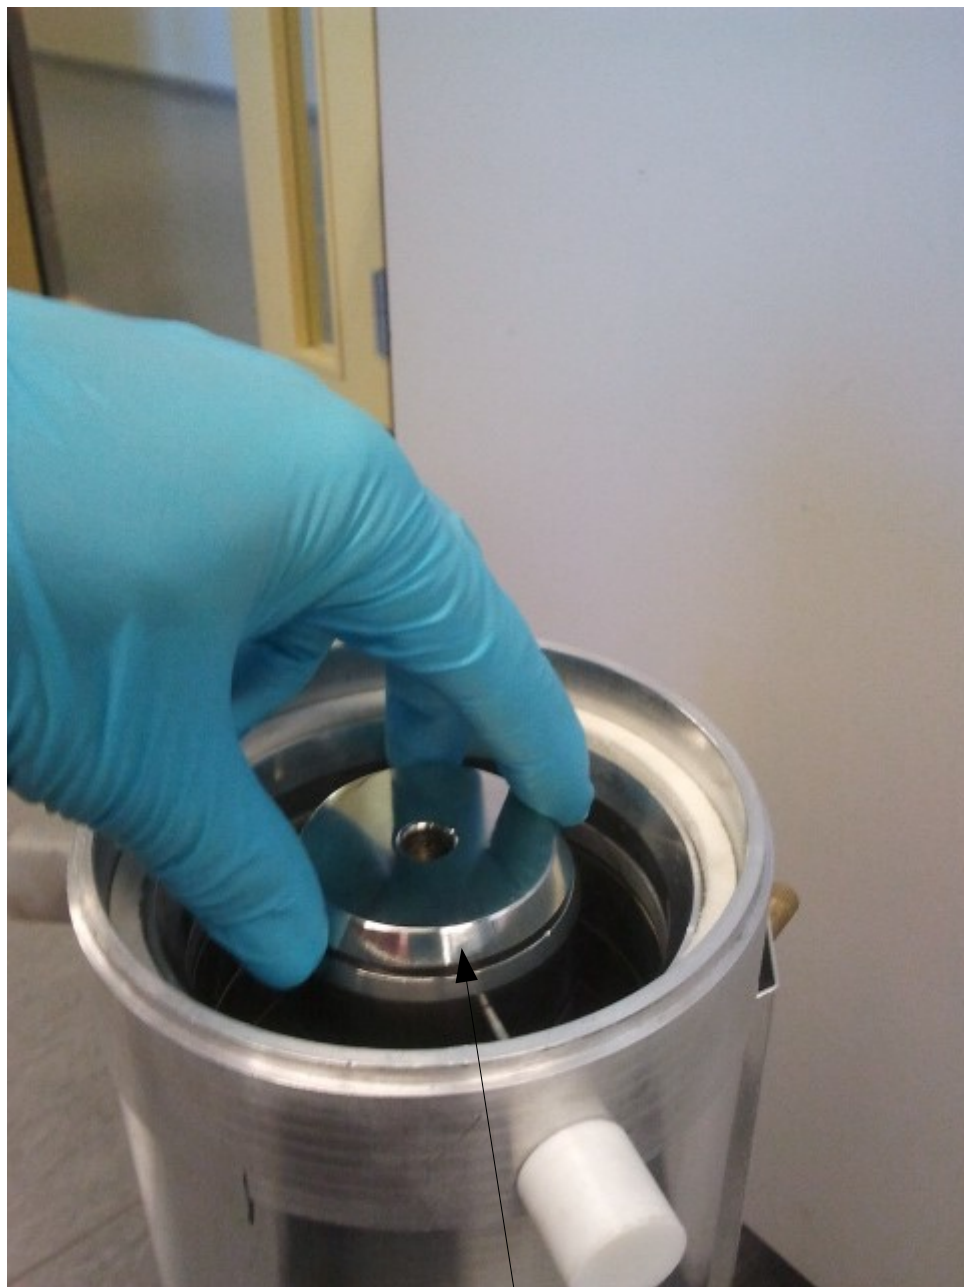

1- once the analyzer is out unscrew the holder  
Of the central electrode

2 – then remove the centering ring  
(it can be quite tight) if they are not there  
you could mark a vertical line across the ring  
and the analyzer with a permanent  
marker to be able to place them back in the  
exact same position

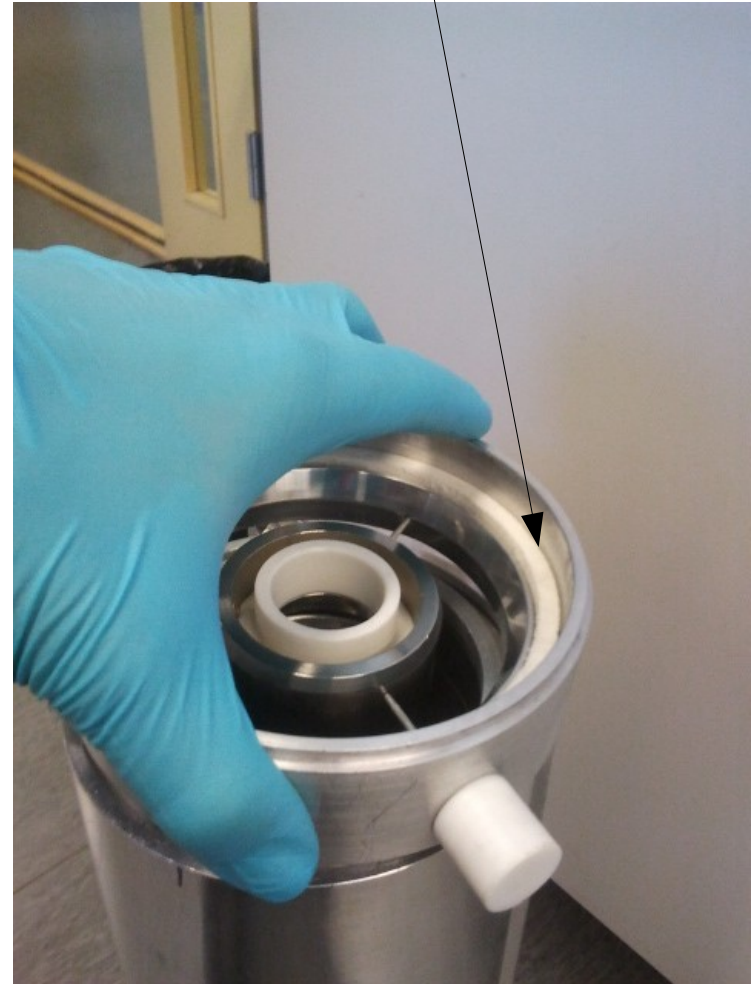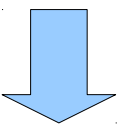



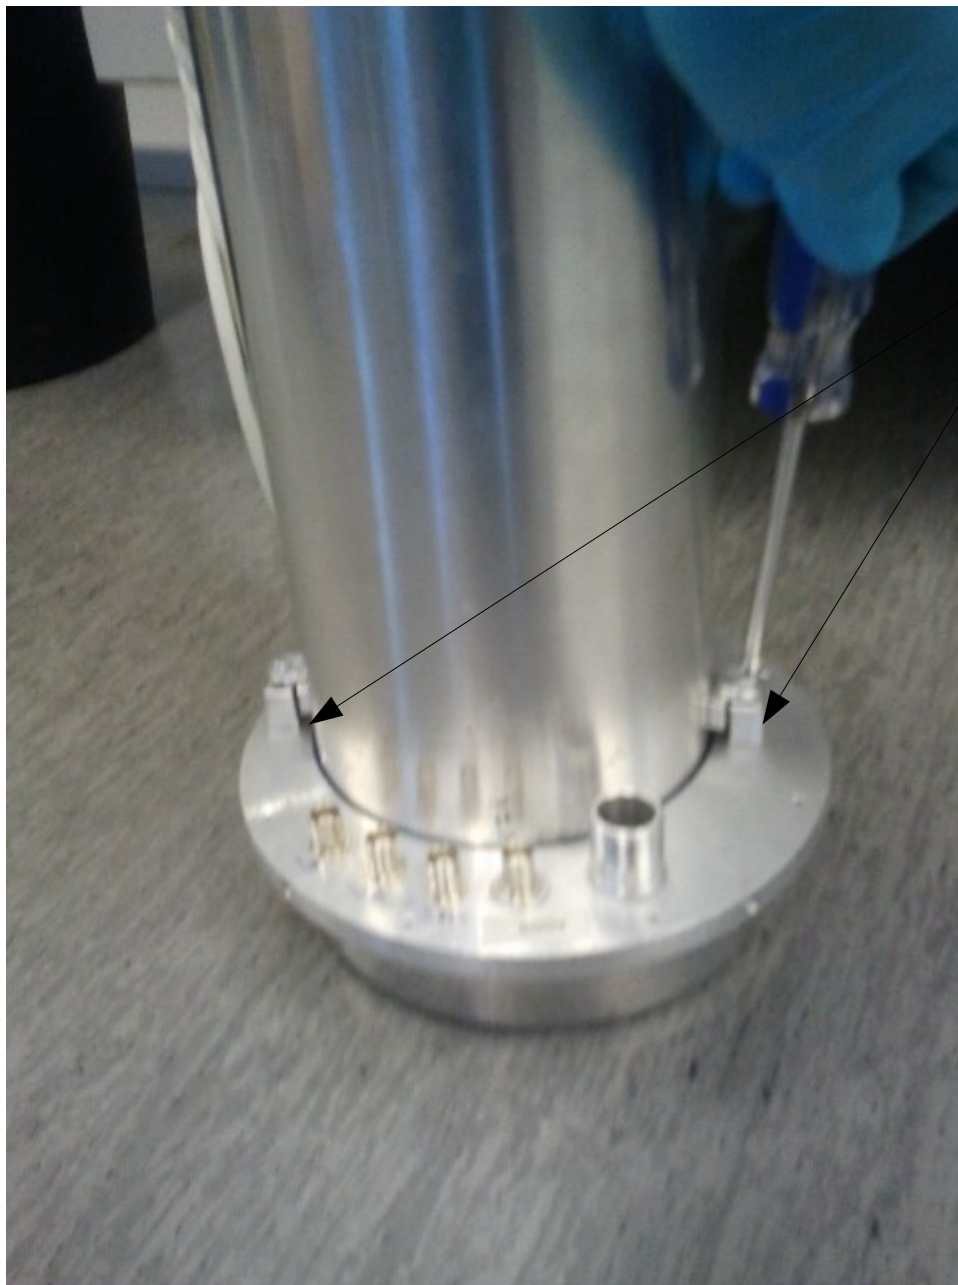

Now it's time to unscrew the screws that  
Keep the outer part together with the  
inner part

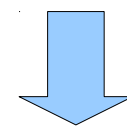

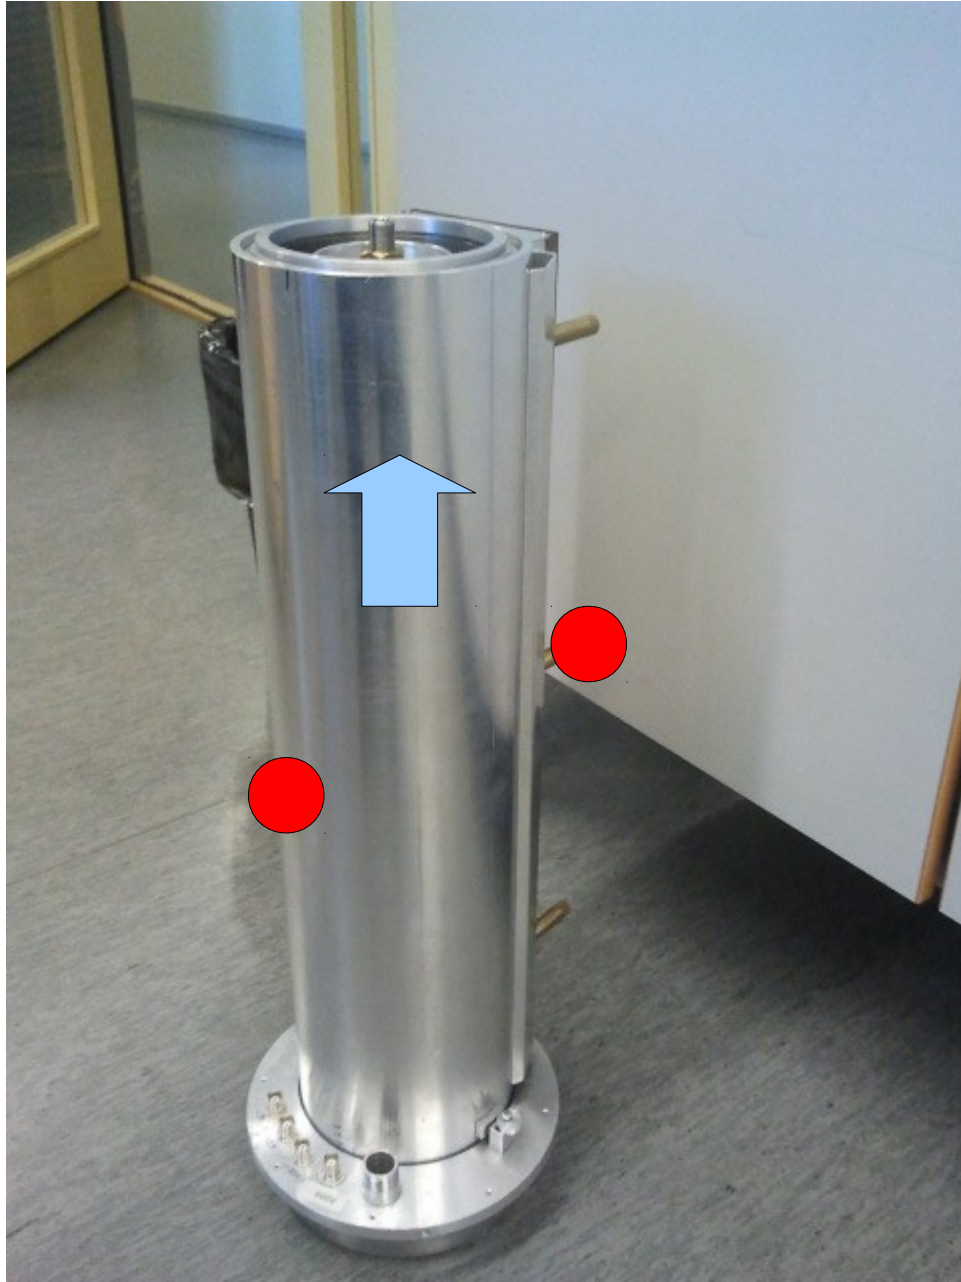

Now the outer part of the analyzer is ready to be lifted

Take care not to scratch the inner part against the outer part

The red circles ● are good points where to hold the analyzer



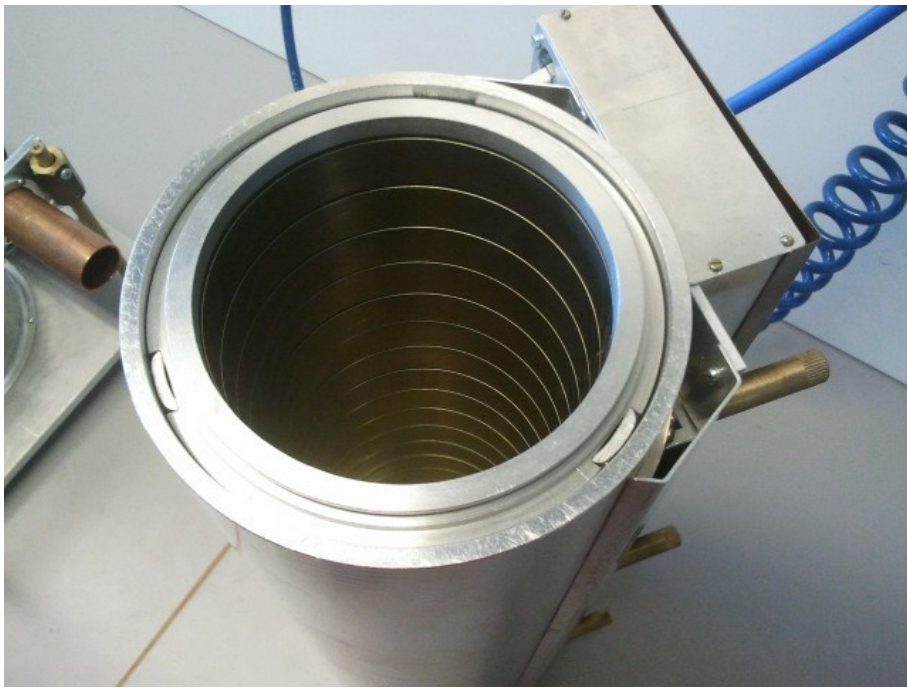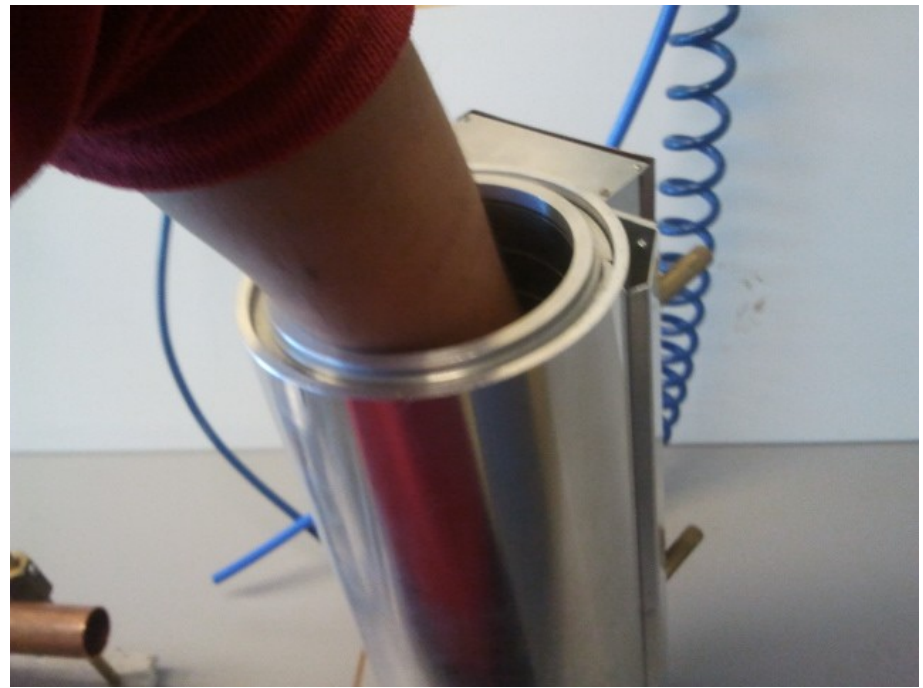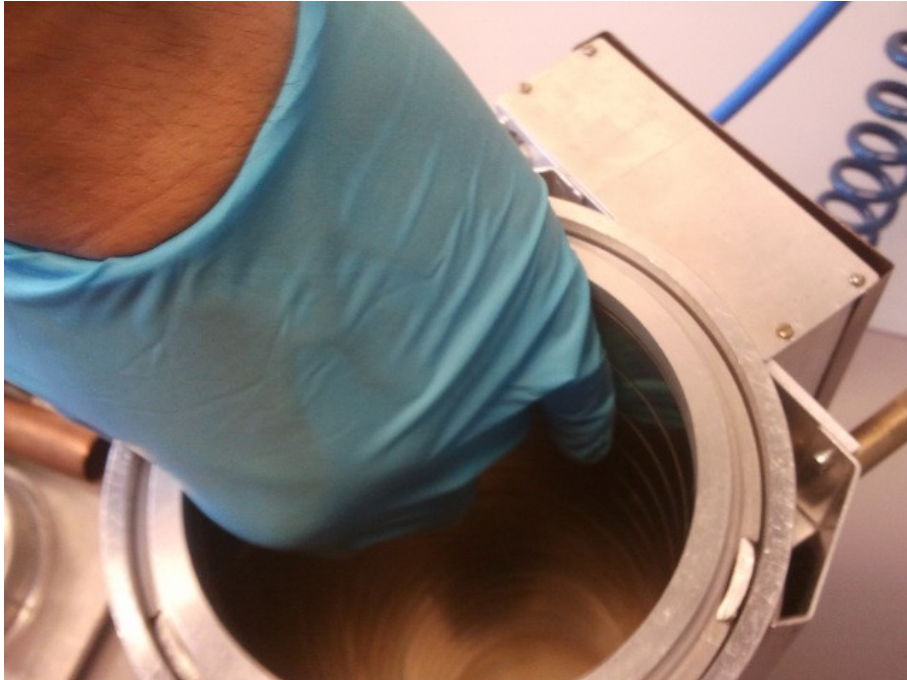

Now it's possible to clean the EM  
With a rubber glove or with wipes and  
Isopropanol  
from the center to the  
Top with particular care to clean the gaps  
Between one EM ring and the other, as well as  
Their surface  
Flip the analyzer upside down and repeat the  
Operation to clean the lower part

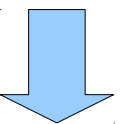



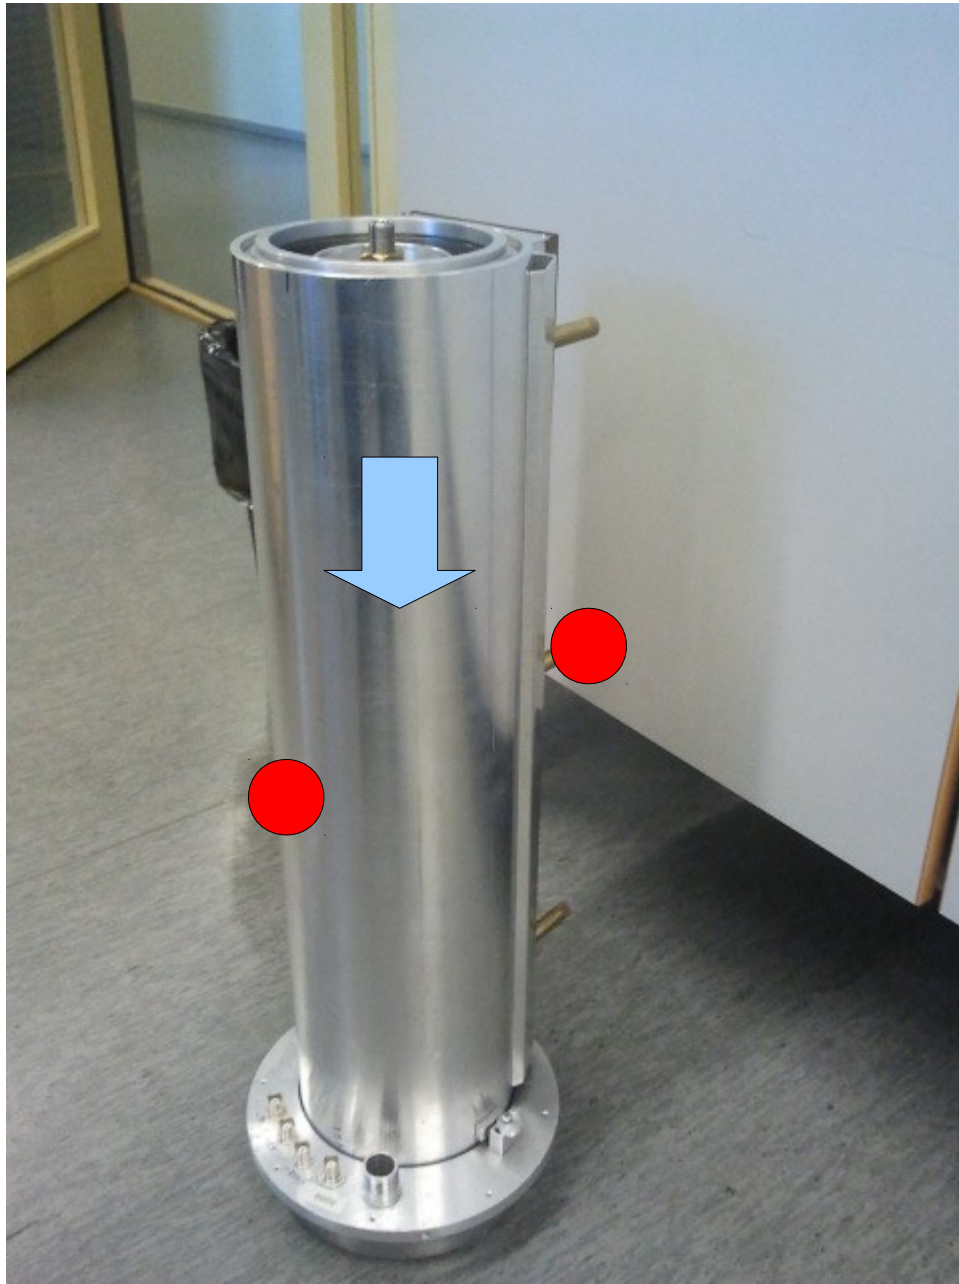

Put back in place the outer part of the analyzer  
To avoid to put it upside down  
Remember that the smaller EM rings are at the top

The red circles ● are good point where to hold the analyzer

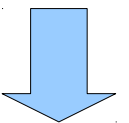

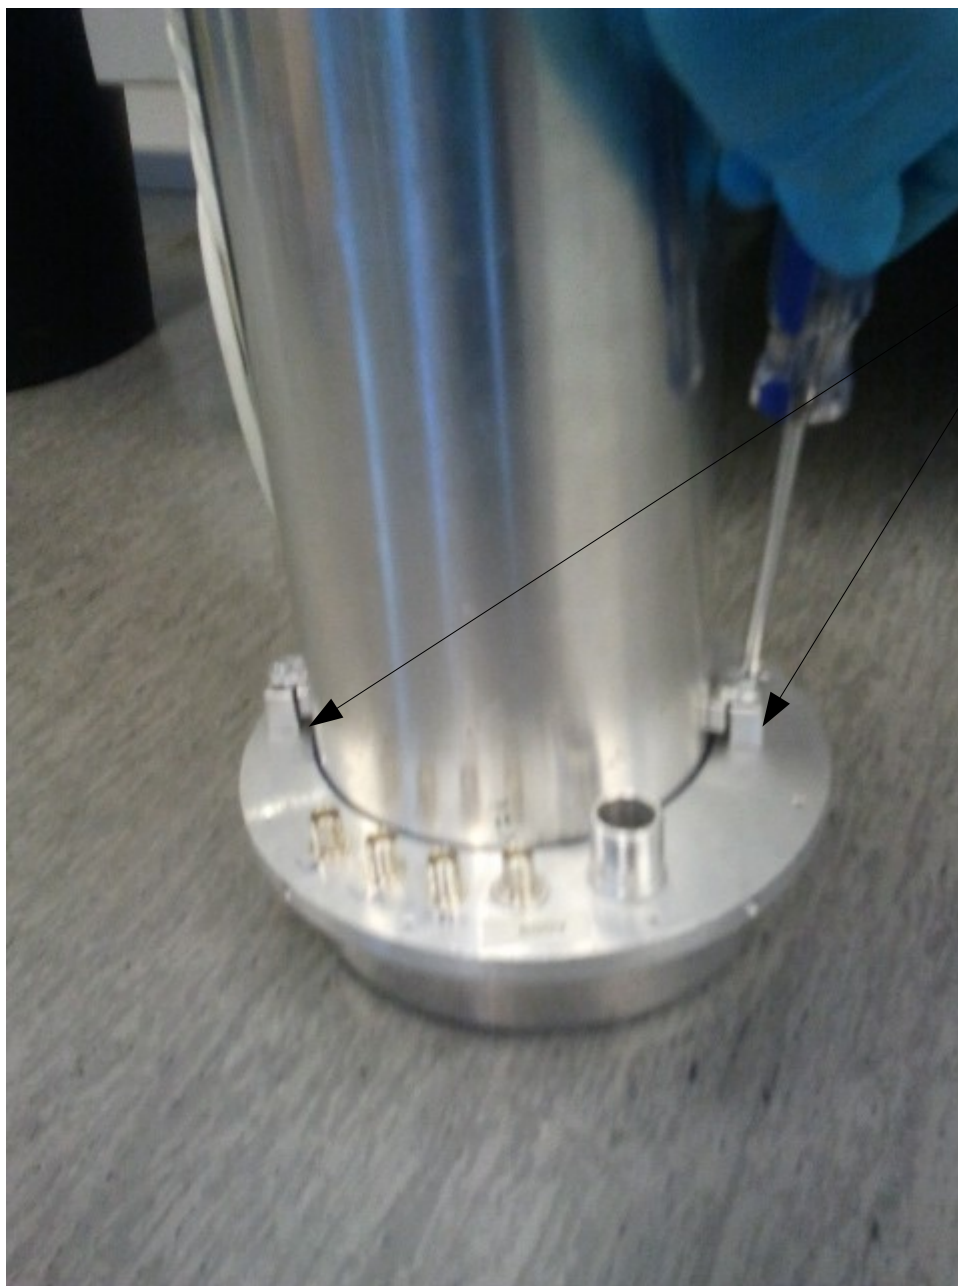

Fix the holders

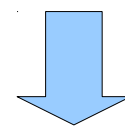

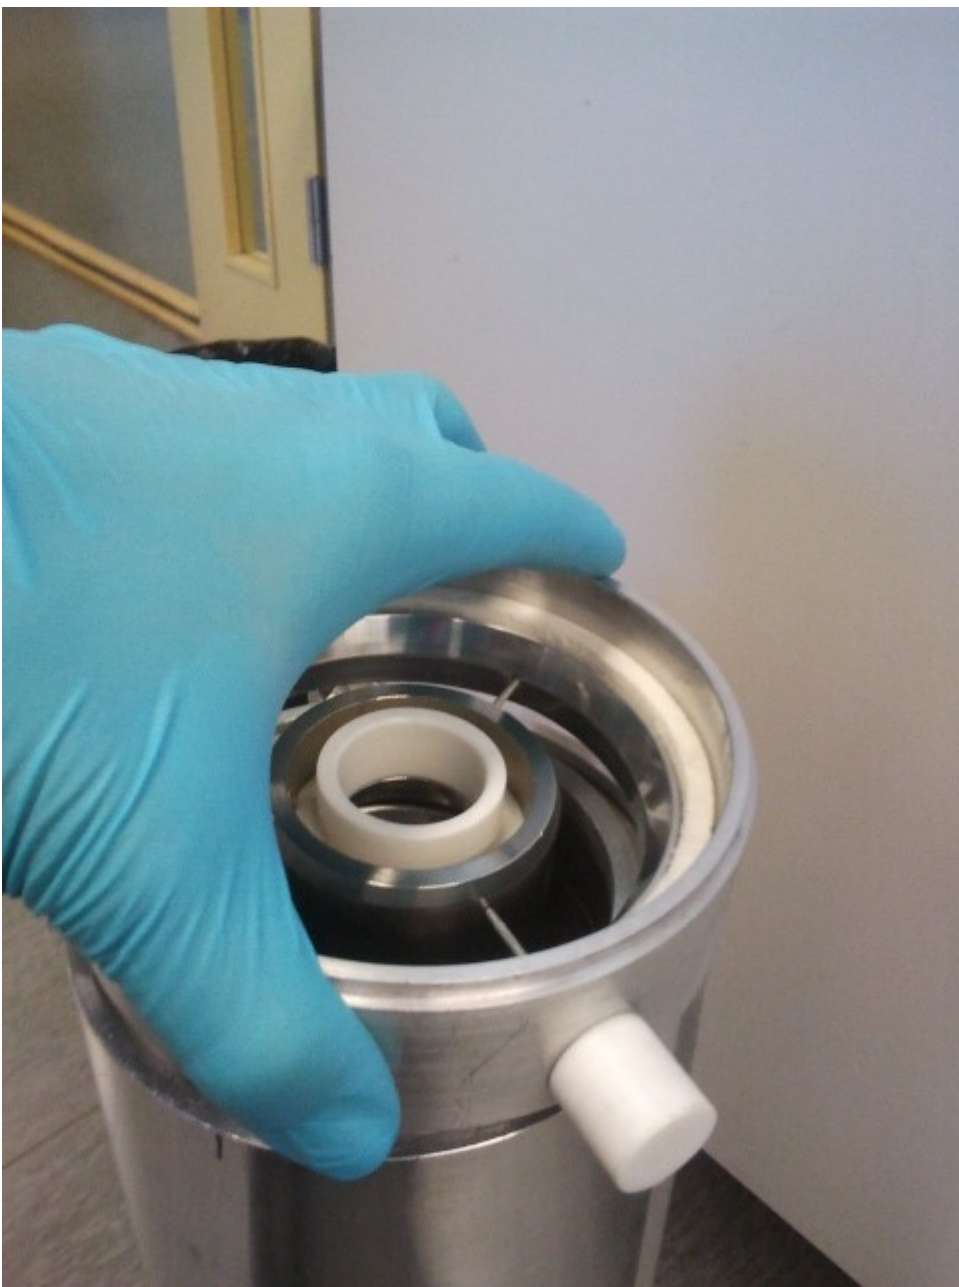

1 - Put back the centering ring  
(there should be some markings)

2 – place back the central electrode holder

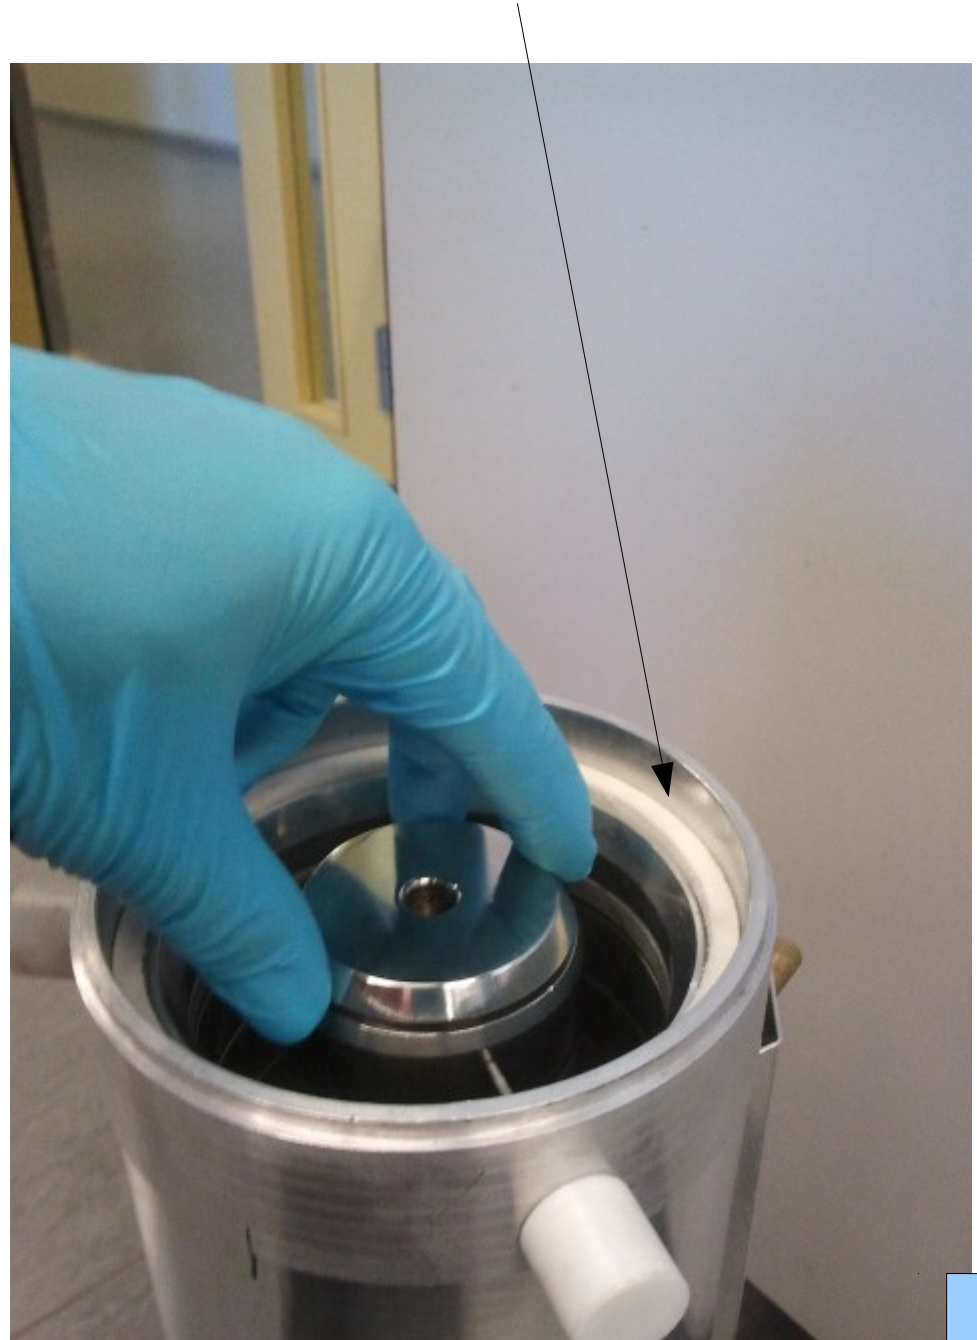



Now it's time to put the analyzer back

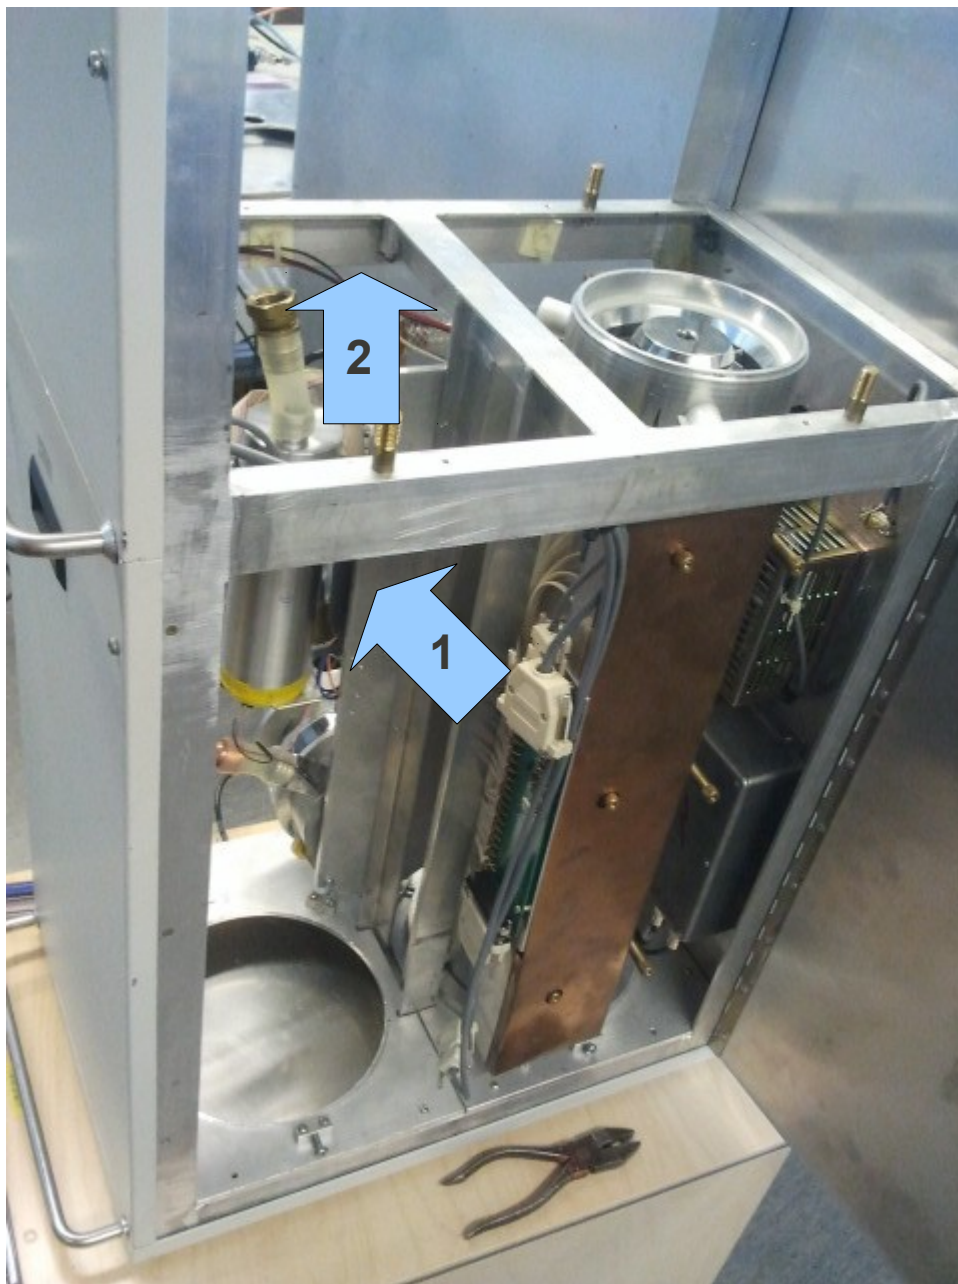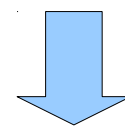



1- Connect the BNCs at the base of the analyzer



2- connect the sheath gas connector

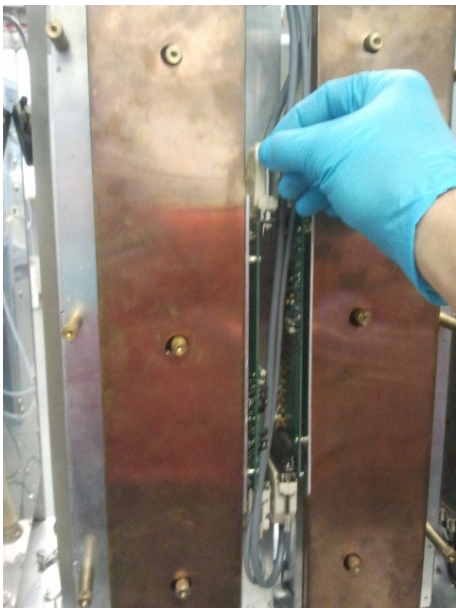

3 – connect back the electronic connectors



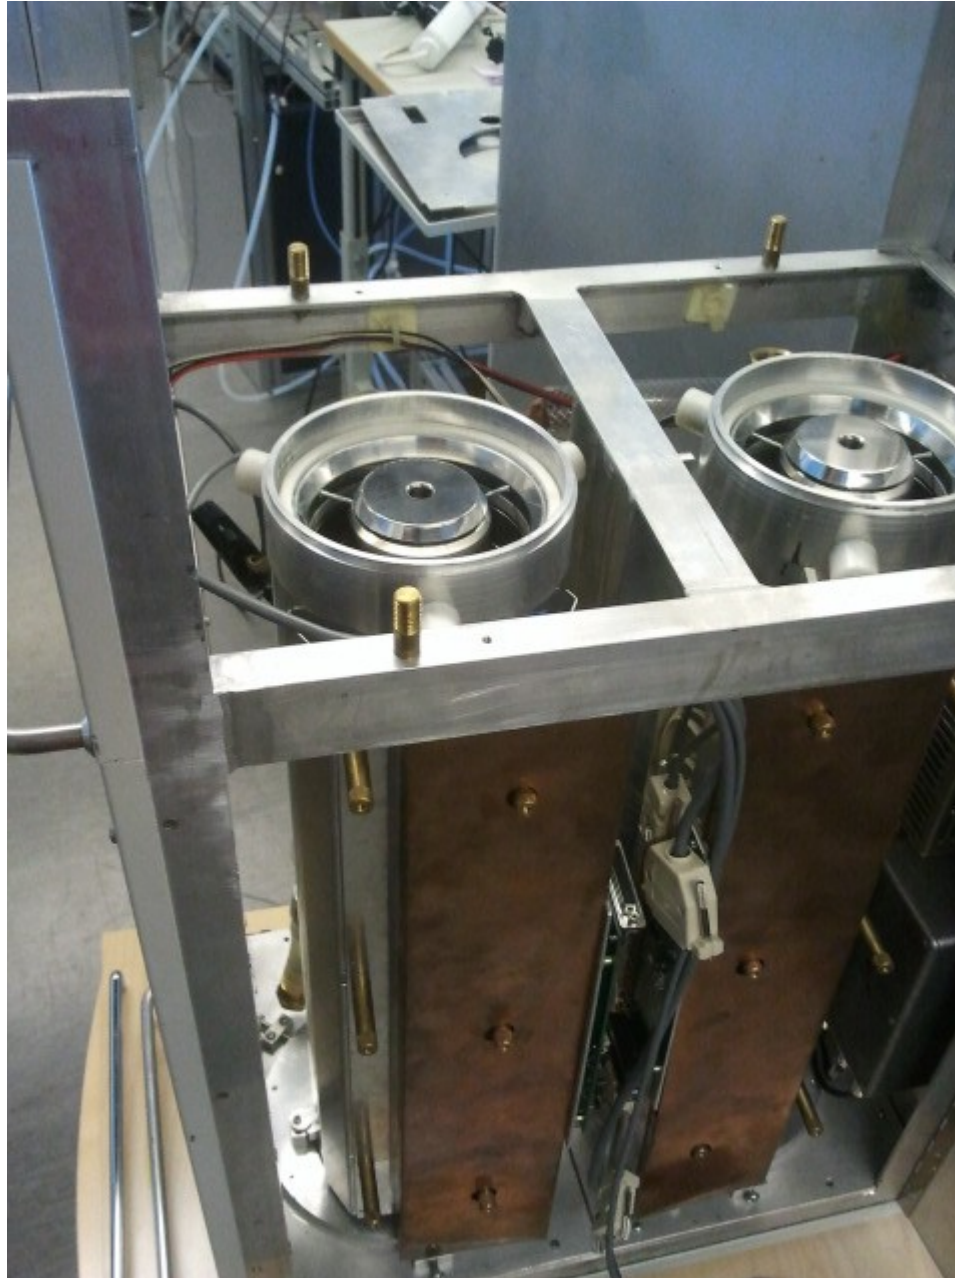

Now it's time to  
Do the same for the other  
Polarity (slide 9 to 21)





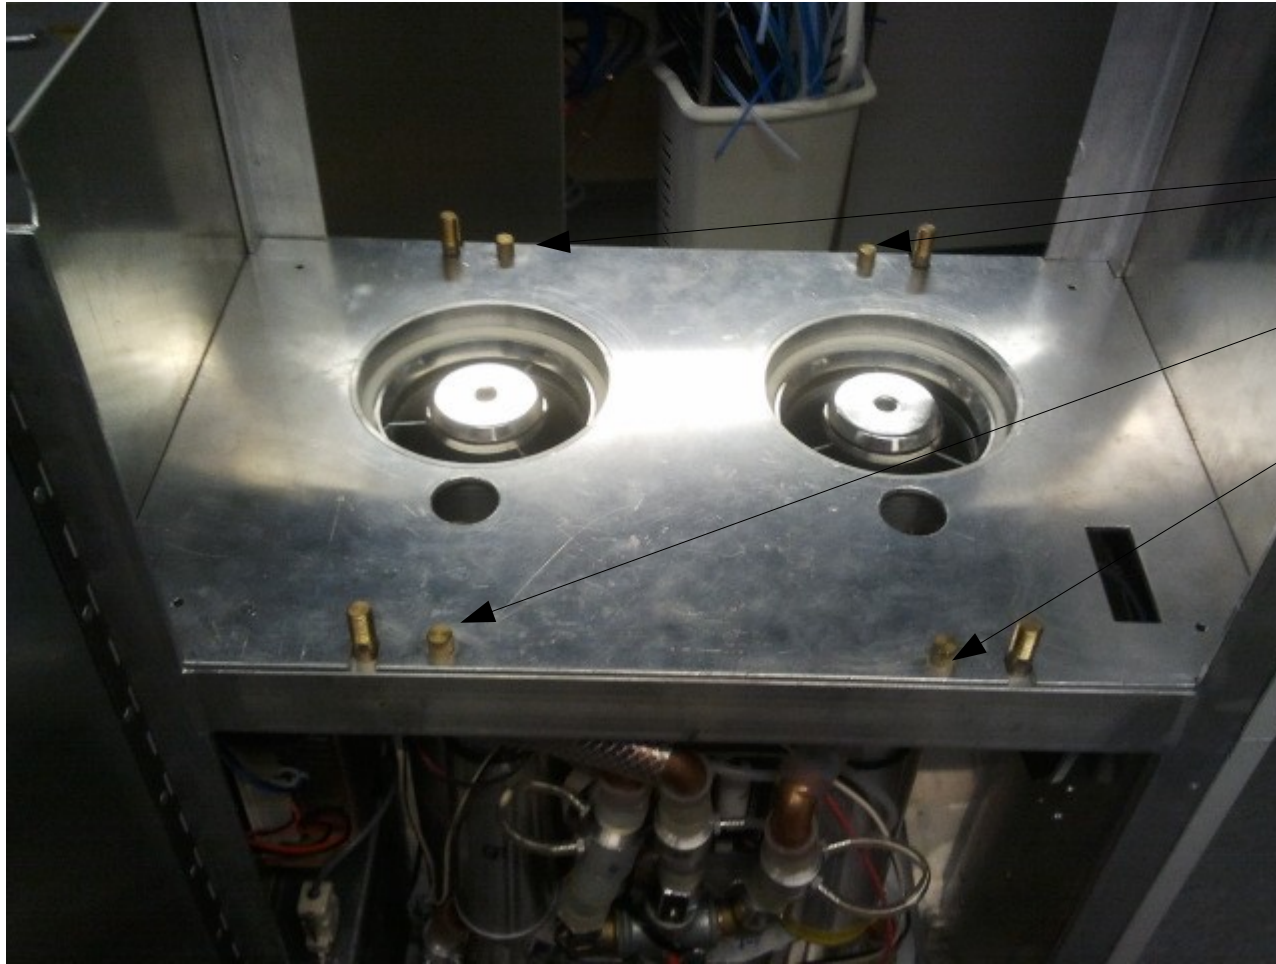

Put back the metallic plate and  
Fix it back with the screws

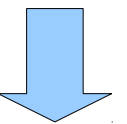

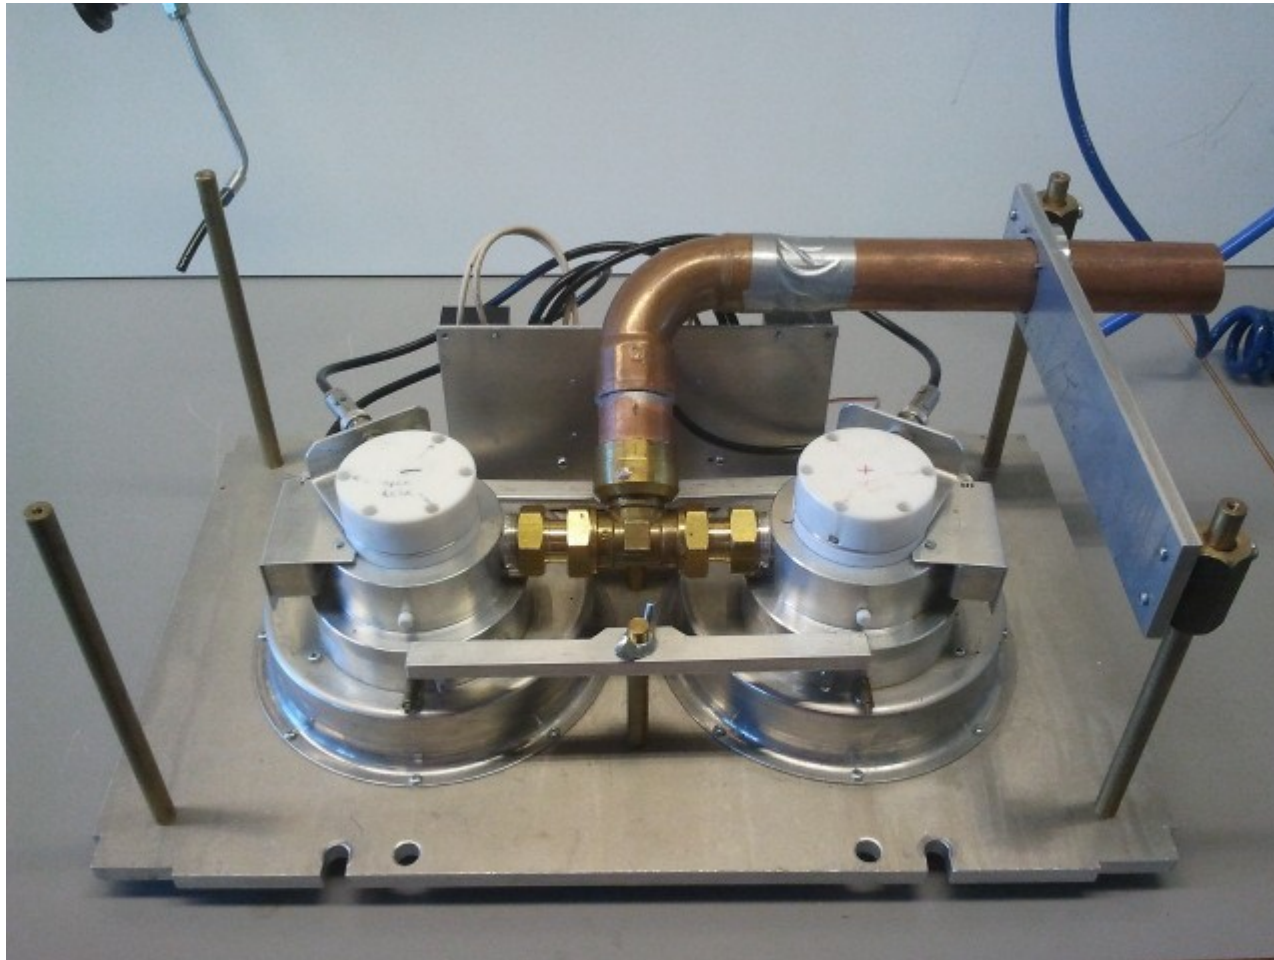

Put back the top part  
And fix it with the butterfly  
screws  
Take particular care to  
Tighten Them evenly  
So that the pressure on the  
plate is equally distributed

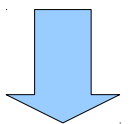

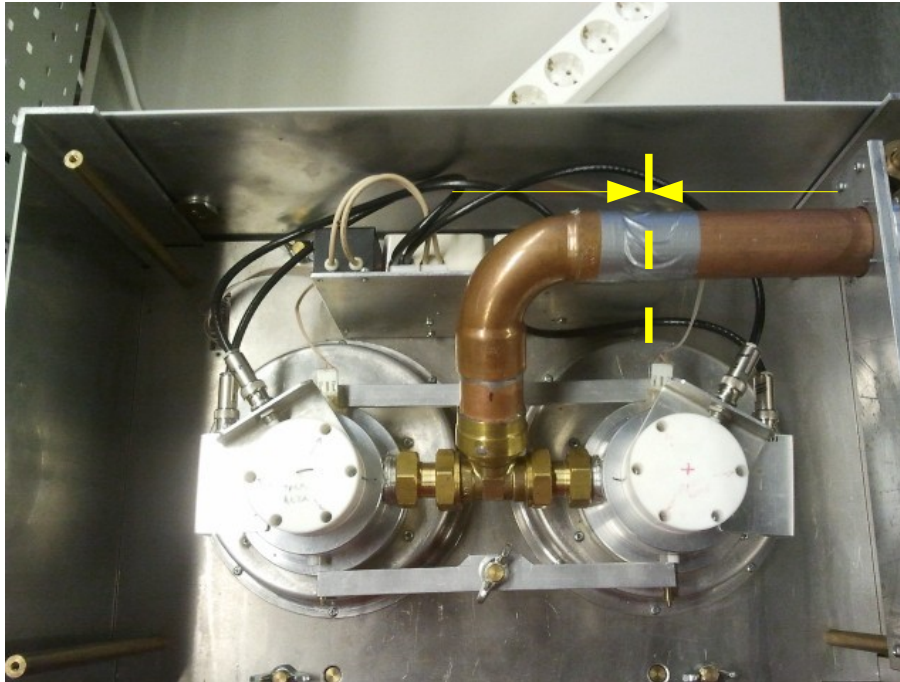

connect the inlet back

END
